# Supplementary material for: Impact of Heart Failure on In-Hospital Outcomes after Surgical Femoral Neck Fracture Treatment
Source: PubMed Central journal article supplement (PMC7957564; doi:10.3390/jcm10050969), 2021-03-02
Supplement: jcm-10-00969-s001.pdf [file jcm-10-00969-s001.pdf]

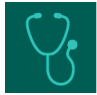

## Supplementary Material

**Table S1.** Multilevel risk adjustment model of in-hospital mortality according to APR-DRG Risk Mortality Level.

|                        | Odds Ratio | <i>p</i> | 95% Confidence Interval |       |
|------------------------|------------|----------|-------------------------|-------|
| Woman                  | 0.66       | <0.001   | 0.62                    | 0.69  |
| Age (1 year)           | 1.08       | <0.001   | 1.07                    | 1.09  |
| Length of stay (1 day) | 1.002      | 0.064    | 1.000                   | 1.004 |
| Risk mortality level   |            |          |                         |       |
| 0-1                    | 1          |          |                         |       |
| 2                      | 2.58       | <0.001   | 2.42                    | 2.75  |
| 3                      | 1.48       | <0.001   | 1.38                    | 1.59  |
| 4                      | 7.24       | <0.001   | 6.6                     | 7.95  |

**Table S2.** Multilevel risk adjustment model of in-hospital mortality according to CMS-adapted model.

|                                                                              | Odds Ratio | <i>p</i> | 95% Confidence Interval |       |
|------------------------------------------------------------------------------|------------|----------|-------------------------|-------|
| Women                                                                        | 0.72       | <0.001   | 0.68                    | 0.76  |
| HF                                                                           | 2.97       | <0.001   | 2.78                    | 3.17  |
| History of PTCA                                                              | 0.74       | 0.016    | 0.59                    | 0.95  |
| History of CABG                                                              | 0.72       | 0.067    | 0.51                    | 1.02  |
| Chronic atherosclerosis                                                      | 1.26       | <0.001   | 1.16                    | 1.37  |
| Cardio-respiratory failure and shock                                         | 10.72      | <0.001   | 10.04                   | 11.43 |
| Valvular and rheumatic heart disease                                         | 1.26       | <0.001   | 1.15                    | 1.39  |
| Hypertension                                                                 | 0.63       | <0.001   | 0.57                    | 0.70  |
| Stroke                                                                       | 7.71       | <0.001   | 6.32                    | 9.41  |
| Renal failure                                                                | 3.45       | <0.001   | 3.25                    | 3.66  |
| COPD                                                                         | 1.40       | <0.001   | 1.32                    | 1.49  |
| Pneumonia                                                                    | 0.86       | <0.001   | 0.81                    | 0.91  |
| Diabetes Mellitus and complications                                          | 0.81       | 0.006    | 0.69                    | 0.94  |
| Protein_calorie malnutrition                                                 | 1.09       | 0.003    | 1.03                    | 1.15  |
| Hemiplegia,paraplegia,paralysis,functional disability 67-69, 100-102,177-178 | 0.80       | 0.004    | 0.69                    | 0.93  |
| Peripheral vascular disease                                                  | 1.33       | <0.001   | 1.20                    | 1.48  |
| Severe cancers                                                               | 3.56       | <0.001   | 3.12                    | 4.07  |
| Trauma CC154-156, 158-161                                                    | 1.44       | <0.001   | 1.29                    | 1.60  |
| Chronic liver disease                                                        | 3.38       | <0.001   | 2.69                    | 4.25  |

HF, heart failure; PCTA, percutaneous transluminal coronary angioplasty; CABG, coronary artery bypass grafting; COPD, chronic obstructive pulmonary disease.

**Table S3.** S3. Poisson regression model for adjusting the length of stay.

|                        | IRR   | <i>p</i> | 95% Confidence Interval |       |
|------------------------|-------|----------|-------------------------|-------|
| heart failure (HF)     | 1.08  | <0.001   | 1.06                    | 1.09  |
| Woman                  | 0.99  | 0.008    | 0.98                    | 1.00  |
| Age (1 year)           | 1.08  | <0.001   | 1.07                    | 1.09  |
| Length of stay (1 day) | 0.999 | <0.001   | 0.999                   | 1.000 |
| Risk mortality level   |       |          |                         |       |
| 0-1                    | 1     |          |                         |       |
| 2                      | 1.19  | <0.001   | 1.18                    | 1.19  |
| 3                      | 1.66  | <0.001   | 1.64                    | 1.68  |
| 4                      | 2.23  | <0.001   | 2.17                    | 2.29  |
